# Supplementary material for: Formaldehyde sensing based on the catalytic reaction of β-HgS nanocrystals
Source: Royal Society of Chemistry journal article supplement (doi:10.1039/c7tc00404d), 2017-01-01
Supplement: c7tc00404d1.pdf [file c7tc00404d1.pdf]

Formaldehyde sensing based on the catalytic reaction of  
 $\beta$ -HgS nanocrystals

Jiang-Shan Shen,\* Jia-Jia Wu, Xiang-Ying Sun, Zhen-Long Wu,  
Ping Gao and Bin Liu

College of Materials Science and Engineering, Huaqiao  
University, Xiamen 361021, China. E-mail:  
jsshens@hqu.edu.cn

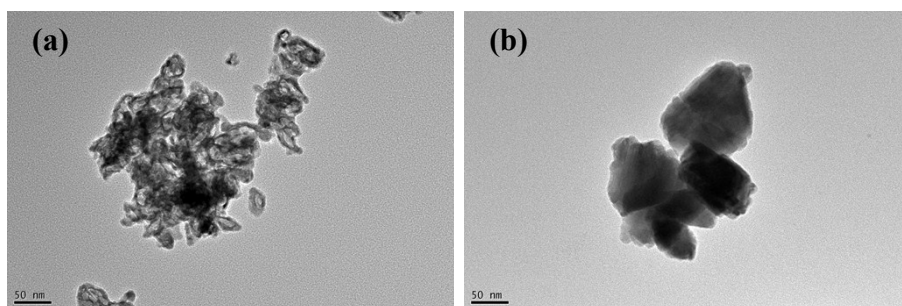

**Fig. S1** TEM images of  $\alpha$  (a)- and  $\beta$  (b)-HgS nanocrystals.

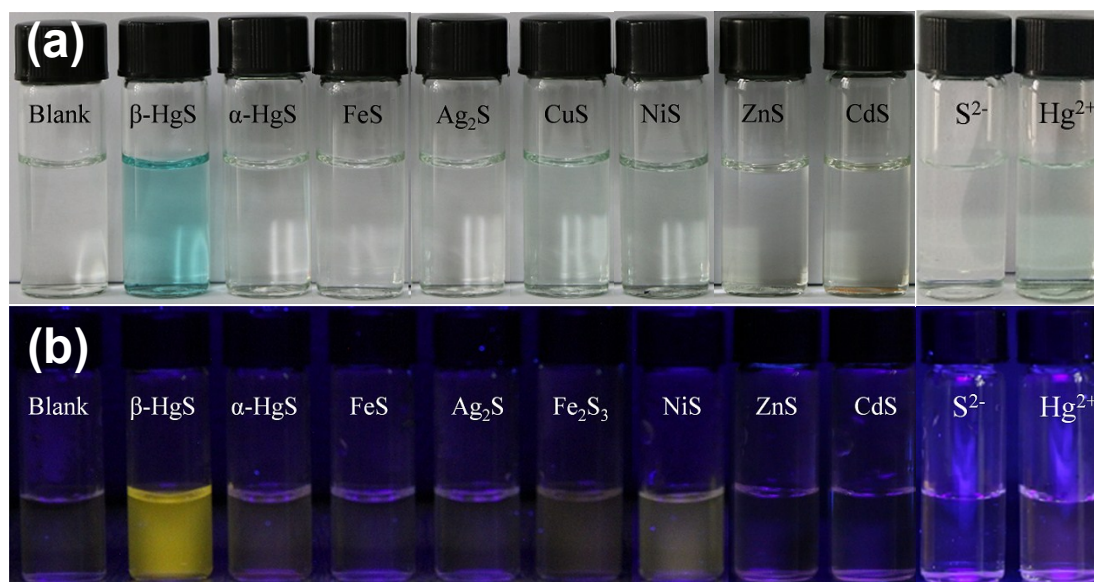

**Fig. S2** Typical photographs of TMB solution in the irradiation of room light (a), and photographs of OPD solution illuminated by 365 nm UV lamp in dark (b) in the presence of a series of metal sulfide nanomaterials. Experimental conditions: (a) [TMB] = 0.5 mM; metal sulfide nanomaterials concentration was set to be 0.333 mg·mL<sup>-1</sup>; reaction temperature of 37 °C; reaction time of 30 min. (b) [OPD] = 0.25 mM; metal sulfide nanomaterials was set to be 0.125 mg·mL<sup>-1</sup>; reaction temperature of 65 °C; reaction time of 60 min.

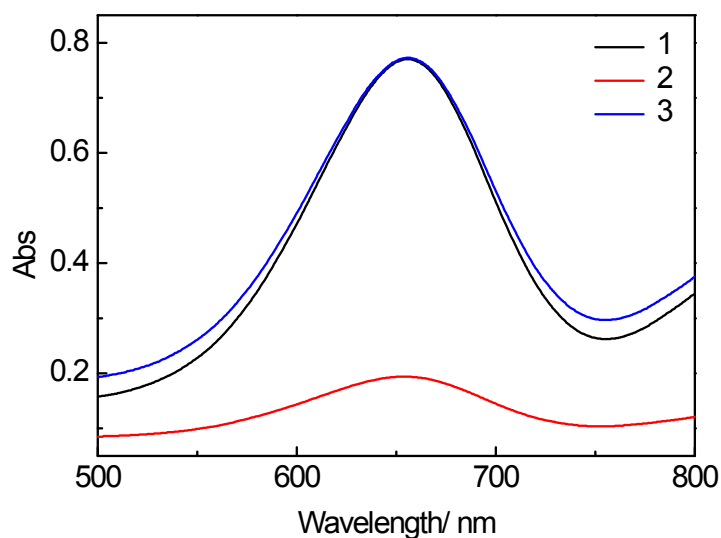

**Fig. S3** The comparison of TMB- $\beta$ -HgS nanocrystals solution in the presence (1) and absence (2) of dissolved oxygen, in the absence of room light (3). Experimental condition: [TMB] = 0.5 mM;  $\beta$ -HgS nanocrystals concentration was set to be 0.333 mg·mL<sup>-1</sup>; reaction temperature of 37 °C; 0.2 M HOAc-NaOAc buffer solution of pH 4.2; reaction time of 30 min.

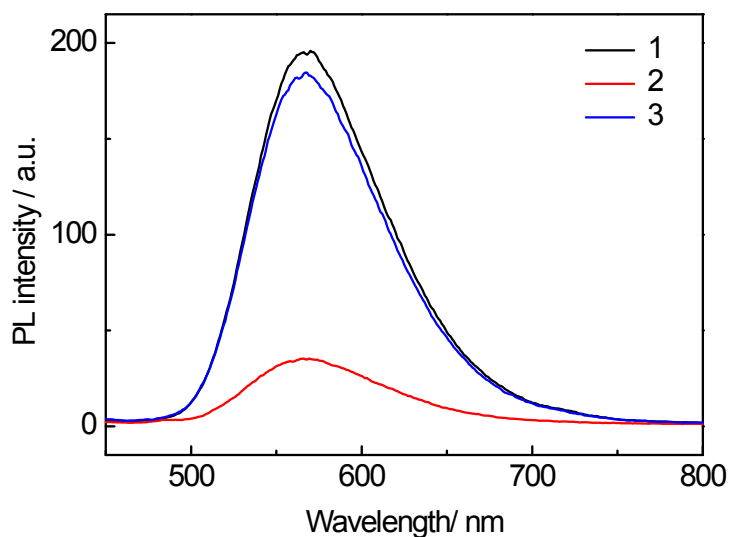

**Fig. S4** The comparisons of OPD- $\beta$ -HgS nanocrystals solution in the presence (1) and absence (2) of dissolved oxygen, in the absence of room light (3). Experimental conditions: [OPD] = 0.25 mM;  $\beta$ -HgS nanocrystals concentration was set to be 0.125 mg·mL<sup>-1</sup>; reaction temperature of 65 °C; 50 mM Tris-HCl buffer solution of pH 7.4; reaction time of 60 min.

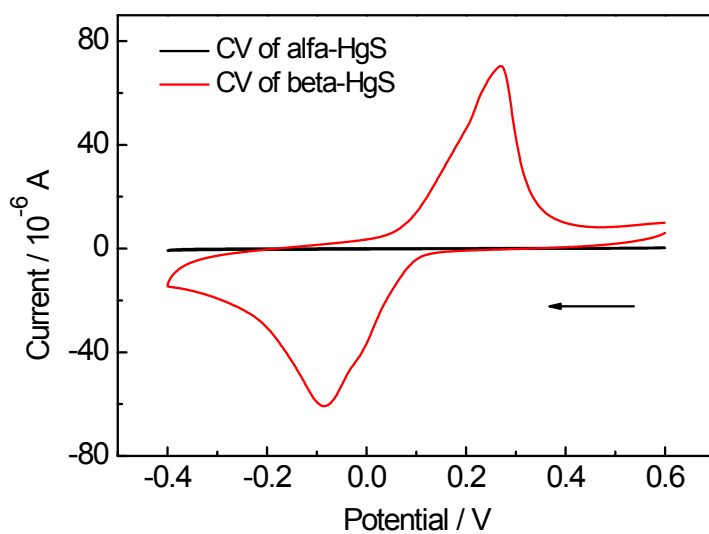

**Fig. S5** CV curves of  $\alpha$ - (black line) and  $\beta$ - (red line) HgS nanocrystals in  $N_2$ -saturated 50 mM Tris-HCl solution of pH 7.4. Scanning rate was 30  $mV \cdot s^{-1}$ .

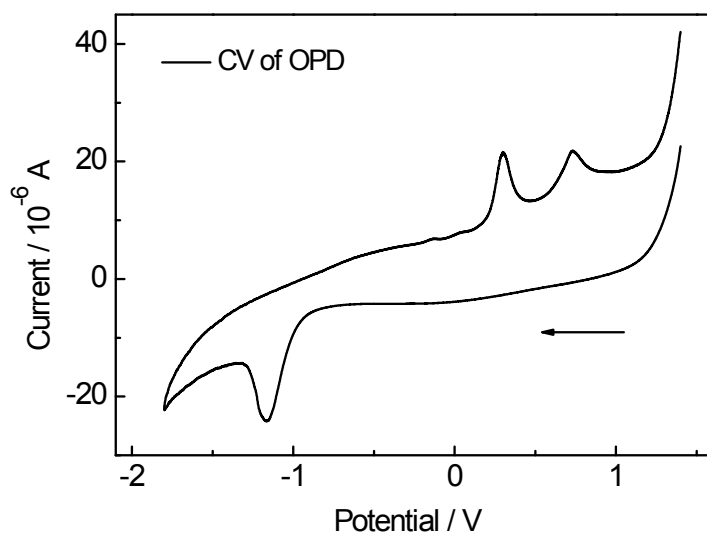

**Fig. S6** CV curve of OPD in  $N_2$ -saturated 50 mM Tris-HCl solution of pH 7.4. Scanning rate was 30  $mV \cdot s^{-1}$ .

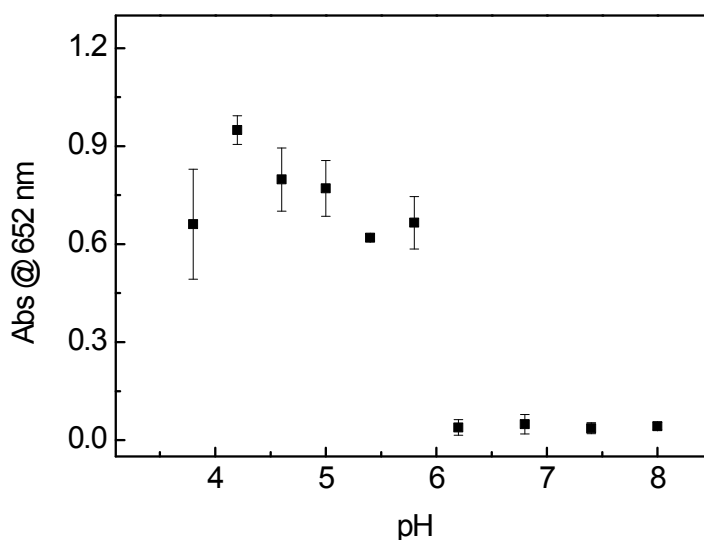

**Fig. S7** pH-dependent oxidase-like activity of  $\beta$ -HgS nanocrystals towards TMB. Experimental conditions: [TMB] = 0.5 mM;  $\beta$ -HgS nanocrystals concentration was set to be 0.333 mg·mL<sup>-1</sup>; reaction temperature of 37 °C; reaction time of 30 min.

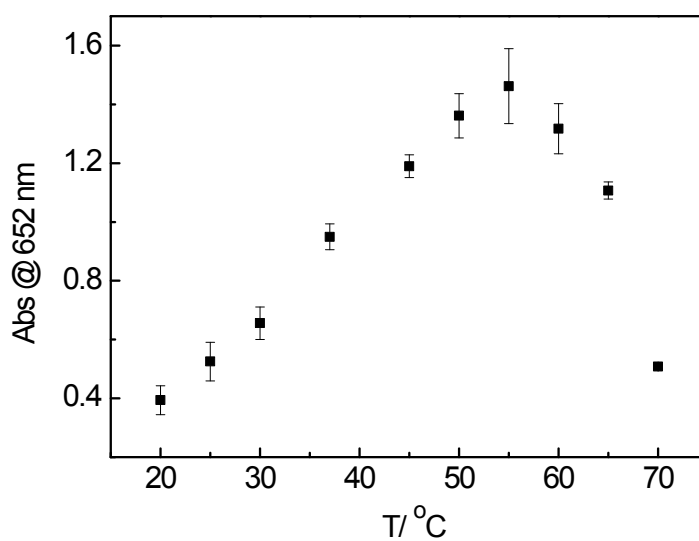

**Fig. S8** Temperature-dependent oxidase-like activity of  $\beta$ -HgS nanocrystals towards TMB. Experimental conditions: [TMB] = 0.5 mM;  $\beta$ -HgS nanocrystals concentration was set to be 0.333 mg·mL<sup>-1</sup>; 0.2 M NaOAc-HOAc buffer solution of pH 4.2; reaction time of 30 min.

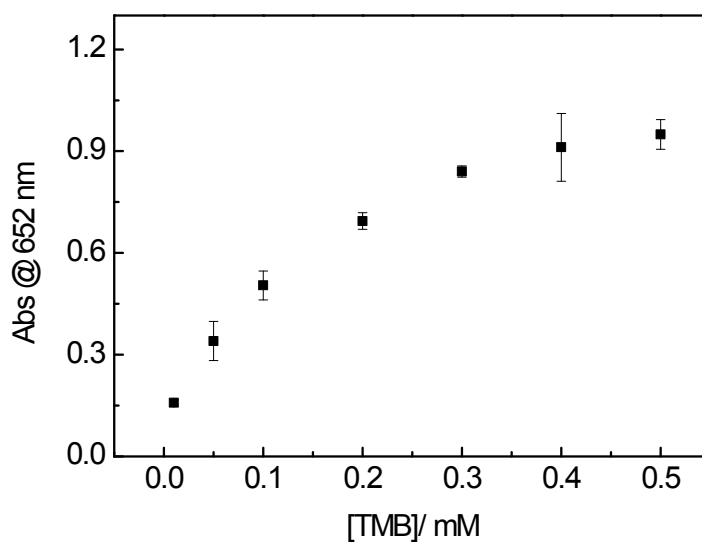

**Fig. S9** The relationship between Abs @ 652 nm and TMB concentration. Experimental conditions:  $\beta$ -HgS nanocrystals concentration was set to be  $0.333 \text{ mg}\cdot\text{mL}^{-1}$ ; reaction temperature of  $37^\circ\text{C}$ ;  $0.2 \text{ M}$  NaOAc-HOAc buffer solution of pH 4.2; reaction time of 30 min.

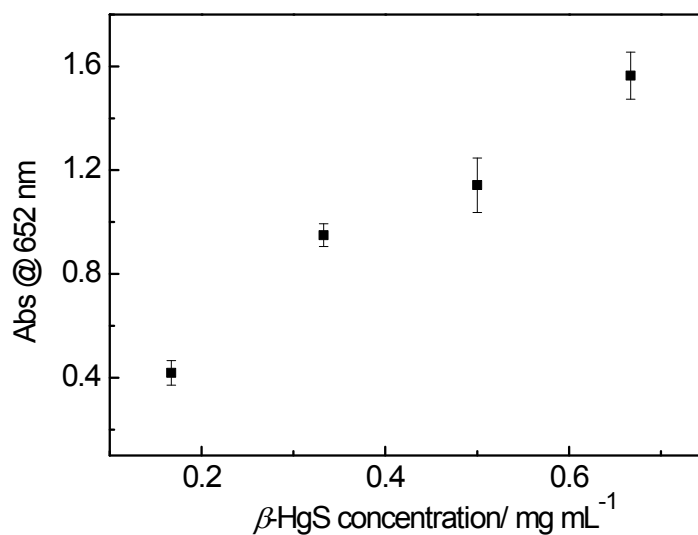

**Fig. S10** The relationship between Abs @ 652 nm and  $\beta$ -HgS nanocrystals concentration. Experimental conditions:  $[\text{TMB}] = 0.5 \text{ mM}$ ; reaction temperature of  $37^\circ\text{C}$ ;  $0.1 \text{ M}$  NaOAc-HOAc buffer solution of pH 4.2; reaction time of 30 min.

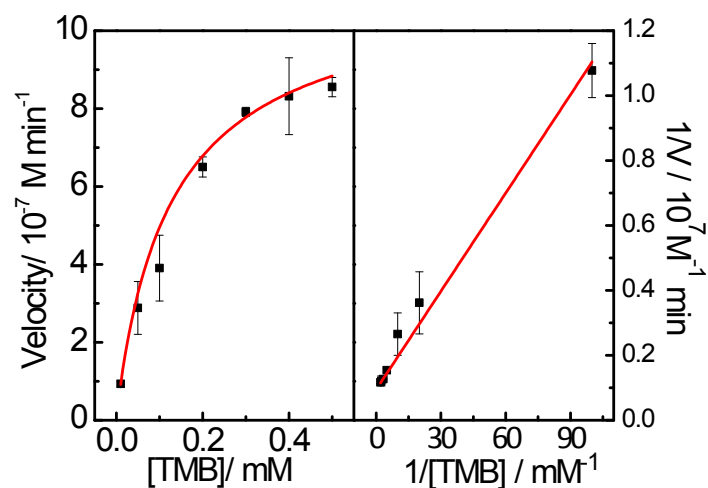

**Fig. S11** Steady-state kinetic analysis of the oxidation reaction of TMB catalyzed by  $\beta$ -HgS nanocrystals on the basis of the Michaelis–Menten model.

**Table S1** Kinetic parameters of the  $\beta$ -HgS nanocrystals –TMB system

| $[E](\text{mg}\cdot\text{mL}^{-1})^a$ | $K_m$ (mM) | $V_{\text{max}}$ ( $\text{M}\cdot\text{min}^{-1}$ ) | $K_{\text{cat}}$ ( $\text{min}^{-1}$ ) |
|---------------------------------------|------------|-----------------------------------------------------|----------------------------------------|
| 0.333                                 | 0.146      | $1.132\times 10^{-6}$                               | $7.92\times 10^{-4}$                   |

<sup>a</sup>  $\beta$ -HgS nanocrystals concentration of  $0.333\text{ mg}\cdot\text{mL}^{-1}$  was equalled to be  $1.43\times 10^{-3}\text{ M}$ , referred to Hg molar concentration.





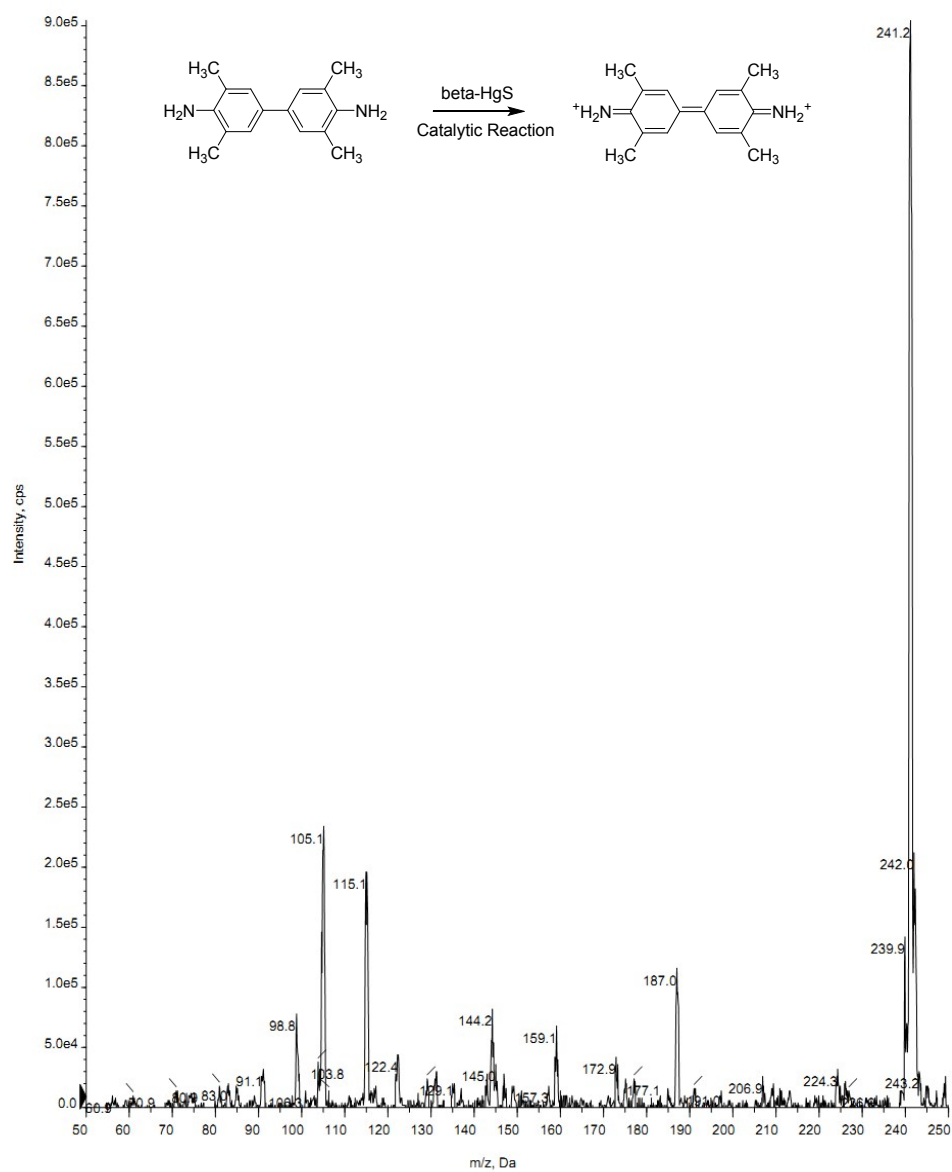

**Fig. S13** The ESI-MS result of the extracted solution of the  $\beta$ -HgS nanocrystals- TMB catalytic reaction system by chloroform.

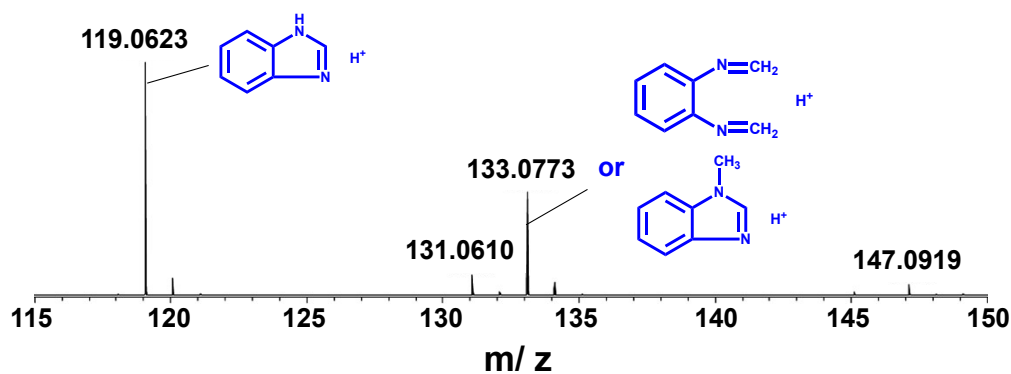

**Fig. S14** The ESI-MS result of reaction product of OPD and formaldehyde.

**Table S2** Recovery experiments of formaldehyde spiked in sleeve-fish and Chinese cabbage samples\*.

Sleeve-fish sample

| No. | Spiked/ $\times 10^{-5}$ M | Measured/ $\times 10^{-5}$ M | Recoveries/% |
|-----|----------------------------|------------------------------|--------------|
| 1   | 0                          | $-0.26 \pm 0.07$             |              |
| 2   | 1.2                        | $1.10 \pm 0.19$              | 113.4        |
| 3   | 2.4                        | $2.35 \pm 0.09$              | 108.6        |

Chinese cabbage sample

| No. | Spiked/ $\times 10^{-5}$ M | Measured/ $\times 10^{-5}$ M | Recoveries/% |
|-----|----------------------------|------------------------------|--------------|
| 1   | 0                          | $0.23 \pm 0.14$              |              |
| 2   | 1.2                        | $1.32 \pm 0.18$              | 90.6         |
| 3   | 2.4                        | $2.48 \pm 0.20$              | 93.7         |

\* The errors were obtained by measuring three parallel samples
